# Supplementary material for: Cost-effectiveness analysis of pre-ART HIV drug resistance testing in Kenyan women
Source: PubMed Central journal article supplement — eClinicalMedicine. 2020 May 22;22:100355. doi: 10.1016/j.eclinm.2020.100355 (PMC7256304; doi:10.1016/j.eclinm.2020.100355), 2020-05-22
Supplement: mmc1.pdf [file mmc1.pdf]

# Supplementary Appendix

This Supplementary Appendix includes a detailed discussion of our HIV microsimulation model, calibration techniques, and additional methods and results not presented in main manuscript.

## Table of Contents

|                                                                        |    |
|------------------------------------------------------------------------|----|
| Section 1: HIV Model.....                                              | 2  |
| A. Overview.....                                                       | 2  |
| B. Demographic Population Structure .....                              | 2  |
| C. HIV Disease Model – Natural History, Treatment, and Monitoring..... | 2  |
| D. Cascade of Care and ART Coverage.....                               | 5  |
| E. HIV Transmission .....                                              | 7  |
| F. Population Growth and Size.....                                     | 8  |
| Section 2: Modeling Drug Resistance.....                               | 8  |
| A. Overview of Drug Resistance Model .....                             | 8  |
| B. Transmission of Drug Resistance .....                               | 9  |
| C. Emergence of Acquired Drug Resistance.....                          | 9  |
| D. Majority and Minority States.....                                   | 10 |
| E. Performance of Drug Resistance Tests.....                           | 10 |
| F. Probability of Virologic Failure .....                              | 11 |
| Section 3: Model Calibration .....                                     | 15 |
| A. Overview of Calibration .....                                       | 15 |
| B. Relationship Between PDR Prevalence and Key Parameters.....         | 15 |
| C. Comparing Model Outputs to Calibration Targets .....                | 15 |
| Section 4: Costs and Resource Utilization.....                         | 19 |
| A. Assumptions for Inpatient Costs .....                               | 19 |
| B. Adjusting for inflation .....                                       | 19 |
| C. Currency conversion .....                                           | 20 |
| D. Results.....                                                        | 20 |

## Section 1: HIV Model

### A. Overview

We developed a microsimulation model of the HIV epidemic in Kenya, where the mode of transmission is predominantly heterosexual. We first run the model starting in 2003 with 100,000 individual adults over age 15 years, representative of Kenya's population, in order to reproduce historical epidemiologic trends through 2018. Starting in 2018, we use the model to simulate and compare individual and population level health outcomes and costs associated with different HIV pre-treatment drug resistance (PDR) testing strategies over a 15-year time horizon. The model includes detailed HIV transmission, disease progression, and care parameters, which we describe below.

Each adult has several individual-level characteristics, including age, gender, HIV status, circumcision status, and number of sexual partnerships. In addition, individuals who are HIV-positive are further described by their CD4 cell count, viral load, treatment regimen, treatment history, opportunistic diseases, and drug resistance status. Each of these individual characteristics is evaluated on a monthly basis. The population size changes based on maturation into the population (people who age into the population at age 15 years) and deaths.

A similar model was previously applied to the South African context.<sup>1-3</sup> We have re-parameterized and calibrated this model using demographic, health, and epidemiologic data from Kenya. In addition, the model has also been further developed to simulate the emergence and transmission of drug resistance to first-line ART, described in detail in **Section 2**. We chose to use a model that includes transmission in order to capture both the treatment and prevention benefits of PDR testing. We follow a large number of individual-based characteristics, which led us to use an individual-based model instead of a deterministic compartmental model.

### B. Demographic Population Structure

We used age- and gender-stratified population data from Kenyan population pyramids to construct the basic population.<sup>4</sup> The initial HIV prevalence of 8.4% in 2003 was based on age- and gender-stratified Kenyan HIV prevalence data from both the Kenyan Demographic and Health Survey and UNAIDS HIV prevalence estimates<sup>5,6</sup>. We obtained the prevalence of male circumcision from published estimates.<sup>5,7,8</sup>

Each individual is modeled as having either 0, 1, 2, or 3 sexual partners based on primary data from the Demographic and Household Survey (DHS) in Kenya (DHS asks the number of people with whom an individual has had sexual relationships in the past 12 months).<sup>5,7,8</sup> We fixed the distribution of sexual partnerships, but people were allowed to dissolve partnerships and select new partners every 12 months on average. We assumed that all partnerships last 12 months regardless of the number of partners one has. We assumed that the HIV status of partners remains unchanged throughout the period of partnership. This approach may underestimate the risk of transmission. For example, an individual with only one HIV-negative spousal partnership had no risk of infection throughout the time horizon, while in reality there is some chance that the partner may get infected by another concurrent partner.

### C. HIV Disease Model – Natural History, Treatment, and Monitoring

#### Natural History

We have previously published a description of our HIV disease model.<sup>1</sup> We followed the disease progression of all infected individuals using the following attributes: age, CD4 cell count, viral load, ART regimen, ART duration, history of opportunistic diseases, virologic failure, and resistance status. The values of all attributes were re-evaluated during each monthly cycle. HIV disease progression was characterized by two primary biological parameters: CD4 cell count and viral load. CD4 cell count was used to determine the monthly probability of opportunistic infection and HIV-related mortality, and the rate of decrease or increase CD4 cell count depending upon ART and virologic failure status, age, and viral load.

#### Initial assignment of CD4 cell count

Since it was unknown how long they had been infected with HIV, patients who already had chronic HIV at the start of the model in 2003 randomly assigned a CD4 cell count value from a uniform distribution ranging from 0-750. The same approach was used to assign CD4 cell count values to adolescents already infected with HIV when they entered the model population at age 15 years. Individuals who became newly infected with HIV after they entered the model

1 population were assigned a CD4 cell count value of 750. For individuals who became newly infected with HIV after  
 2 the start of the microsimulation, they were assigned an initial CD4 cell count of 750.

3  
 4 Initial assignment of viral load

5 Among patients who were already infected with HIV at the start of the model in 2003, initial viral load was assigned  
 6 differently depending on whether was already on treatment and whether the patient had chronic HIV. Patients already  
 7 on treatment were assigned an initial viral load of 2.6 logs (398 copies/mL). Patients with chronic HIV who were not  
 8 yet on treatment were assigned an initial viral load drawn from a normal distribution with a mean viral load of 4.5  
 9 logs, a standard deviation of 0.8 logs, and with lower and upper bounds of 2.6 logs and 6.0 logs, respectively. Patients  
 10 with acute HIV at the start of the model in 2003 were assigned a viral load of 6.0 logs. For new infections, we assign  
 11 a viral load drawn from a normal distribution with a mean viral load of 4.5 logs, a standard deviation of 0.8 logs, and  
 12 with lower bound of 2.6 logs.

13  
 14 CD4 cell count dynamics

15 The CD4 cell count was modeled as a continuous variable that varied based on the viral load, ART, and virologic  
 16 failure status. CD4 cell count decreases each month that a patient is either: a) not on ART, b) not adherent to ART,  
 17 or c) is experiencing virologic failure while on ART. CD4 cell count decreases at a rate that depends on viral load.<sup>9</sup>  
 18 Given the controversial relationship between HIV viral load and CD4 change, we allowed two non-linear determinants  
 19 of CD4 decline, both guided by published data<sup>9,10</sup>: random variability around the regression line, and a slower rate of  
 20 decline with lower CD4. Each month there is a drop in CD4 cell count, the new value is calculated by the following  
 21 equation:

22  
 23 
$$\text{“this month” CD4 cell count} = \text{“last month” CD4 cell count} - \text{monthly CD4 decrease,}$$

24  
 25 where the “monthly CD4 decrease” value is drawn at random from a distribution centered around the “monthly  
 26 decrease in CD4 cell count” according to viral load level (Table S1). However, if a patient has an opportunistic  
 27 infection, the CD4 cell count decrease that month is equal to 58.5, independent of viral load level, with the caveat that,  
 28 in our model, CD4 cell count is never allowed to drop below 1.0.

29

| Log viral load | Monthly Decrease in CD4 Cell Count |
|----------------|------------------------------------|
| 0 – 2.6        | 0                                  |
| 2.601-3.7      | 4.4                                |
| 3.701- 4.5     | 5.5                                |
| >4.5           | 6.6                                |

30 **Table S1. Monthly Decrease in CD4 Cell Count by Viral Load**

31 After starting an ART regimen that begins to effectively decrease the patient’s viral load, the CD4 cell count rises  
 32 each month that the ART regimen remained effective. The monthly rate of increase in CD4 cell count gradually  
 33 decreases with each additional month that a patient has been on ART, and the strongest reproducible predictor of the  
 34 maximum level the CD4 cell count will achieve while on effective ART is the CD4 cell count at the time of treatment  
 35 initiation.<sup>11-14</sup> We assume that after 48 months of effective ART there is no further increase in CD4 cell count.  
 36 Published data on CD4 rise were extracted using the graph digitizing program DigitizeIt v.1.5 (Braunschweig,  
 37 Germany), and the following model was fit to the data to describe the monthly rate of CD4 cell count increase:

38  
 39 
$$\text{Monthly increase in CD4 cell count} = 75 * \log((\text{ART duration} + 2) / (\text{ART duration} + 1)),$$

40 where ART duration is the number of months since ART initiation. The *monthly increase in CD4 cell count* is  
 41 multiplied by 0.8 for patients older than 40 years, based on data suggesting that older individuals have an incomplete  
 42 CD4 cell count response to ART.<sup>13</sup>

43  
 44 Viral load dynamics

45 Effective ART suppresses viral replication. Each month that a patient receives an effective ART regimen, the viral  
 46 load decreases by 0.7 logs, for a maximum of 6 months. Thus, if patient began with a viral load of 6 logs (1 million  
 47 copies/mL), which is the maximum possible viral load in the model, then after 6 months of effective ART the patient  
 48 would have a viral load of 1.7 logs (50 copies/mL). Also, the lowest possible viral load allowed in the model is 1.7  
 49 logs. After a patient experiences virologic failure on ART or stops taking ART, the viral load immediately increases  
 50 to the highest prior viral load level for the patient.

1  
2  
3 **Risk of opportunistic infections and mortality**

4 The risk of opportunistic diseases and mortality were dependent on the current CD4 cell count level (Table S2).<sup>15-17</sup>  
5 We calculated the risk of a severe opportunistic disease based on the risk of developing a World Health Organization  
6 (WHO) Stage 4 disease plus the risk of developing opportunistic pulmonary tuberculosis (TB). We aggregated data  
7 on the risk of chronic diarrhea, esophageal candidiasis, wasting syndrome, severe bacterial infection, pulmonary TB,  
8 extrapulmonary TB, PCP, CMV, cryptococcal meningitis, and toxoplasmosis when calculating the risk of severe  
9 opportunistic diseases.<sup>15,17</sup>  
10

| HIV disease parameter                                                               | Parameter Value | Source                                                 |
|-------------------------------------------------------------------------------------|-----------------|--------------------------------------------------------|
| Monthly probability of developing opportunistic diseases by CD4 lymphocyte count, % |                 | Holmes et al. <sup>16</sup> Badri et al. <sup>15</sup> |
| 0-49 cells/μL                                                                       | 10.0            |                                                        |
| 50-99 cells/μL                                                                      | 5.0             |                                                        |
| 100-199 cells/μL                                                                    | 3.7             |                                                        |
| 200-299 cells/μL                                                                    | 2.4             |                                                        |
| 300-399 cells/μL                                                                    | 1.0             |                                                        |
| 400-499 cells/μL                                                                    | 0.3             |                                                        |
| ≥500 cells/μL                                                                       | 0               |                                                        |
| Monthly probability of HIV mortality <u>without</u> ART, by CD4 lymphocyte count, % |                 | Badri et al. <sup>15</sup>                             |
| 0-49 cells/μL                                                                       | 4.8             |                                                        |
| 50-99 cells/μL                                                                      | 2.0             |                                                        |
| 100-199 cells/μL                                                                    | 1.6             |                                                        |
| 200-299 cells/μL                                                                    | 1.2             |                                                        |
| 300-399 cells/μL                                                                    | 1.0             |                                                        |
| 400-499 cells/μL                                                                    | 0.8             |                                                        |
| ≥500 cells/μL                                                                       | 0.5             |                                                        |
| Monthly HIV mortality <u>with</u> ART, by CD4 lymphocyte count, %                   |                 | Lawn et al. <sup>17</sup>                              |
| 0-49 cells/μL                                                                       | 3.2             |                                                        |
| 50-99 cells/μL                                                                      | 1.1             |                                                        |
| 100-199 cells/μL                                                                    | 0.5             |                                                        |
| 200-299 cells/μL                                                                    | 0.2             |                                                        |
| 300-399 cells/μL                                                                    | 0.2             |                                                        |
| 400-499 cells/μL                                                                    | 0.2             |                                                        |
| ≥500 cells/μL                                                                       | 0.1             |                                                        |

**Table S2. Probability of opportunistic infections and HIV-related mortality by CD4 cell count**

11  
12 **Treatment and Monitoring**

13 We assume that, as of 2016, all individuals diagnosed with HIV qualify to receive ART, regardless of CD4 cell count,  
14 as currently recommended by the Kenyan Ministry of Health guidelines.<sup>18</sup> Use of dolutegravir in Kenya began in 2018  
15 for 10,000 patients initiating ART across 24 different health facilities as a pilot project.<sup>19</sup> According to UNAIDS  
16 estimates, there 62,000 new HIV infections in Kenya in 2016, with estimates ranging from 45,000 to 81,000.<sup>6</sup> Based  
17 on this, we roughly estimated that in 2018 there would be ~50,000 new HIV infections. Thus, for our model, since  
18 there were 10,000 patients who received dolutegravir-based ART in 2018, we assume that for any given patient  
19 initiating ART in 2018 there is a 20% chance they will receive dolutegravir-based ART (as 10,000 / 50,000 = 20%).  
20 Patients who do not receive dolutegravir-based ART receive non-nucleoside reverse transcriptase inhibitor (NNRTI)-  
21 based ART. We assume protease inhibitor (PI)-based ART is the second-line ART regimen for patients in whom  
22 virologic failure is detected on either dolutegravir-based or NNRTI-based ART. This dolutegravir pilot phase began  
23 prior to May 2018 when evidence from Botswana revealed a potential early signal for about a potential increased risk  
24 of neural tube defects in association with use of dolutegravir-based ART from the time of conception.<sup>20</sup>  
25

26 In July 2018, WHO recommended use dolutegravir-based ART as the preferred empiric first-line regimen for women  
27 only if they are receiving an effective form of contraception.<sup>21</sup> More recent evidence from Botswana suggests that  
28 while the potential increased risk of neural-tube defects is still significant it may not be as large as what the 2018  
29 analysis found.<sup>22</sup> In response, WHO has updated its guidelines to provide reassurance and strongly recommend  
30 dolutegravir-based ART as the preferred empiric first-line ART regimen for HIV-infected women.<sup>23</sup> However, it

remains to be seen what proportion of HIV-infected women will use dolutegravir-based ART moving forward. Thus, for women, in our base-case scenario, we assume that for any given woman initiating ART there is a 40% chance she will receive dolutegravir-based ART. This assumption was made in anticipation of potential concerns about dolutegravir from either from health facilities delivering ART or from the patient herself and takes into account estimates that about 40% of women in Kenya use some form of contraception.<sup>8</sup> For men, we assume scale-up of dolutegravir use occurs relatively quickly with 75% of HIV-infected men initiating ART in 2019 receiving dolutegravir-based ART and 100% of men initiating ART in 2020 or later receiving dolutegravir-based ART (Table S3).

| Year           | Men  | Women |
|----------------|------|-------|
| 2018           | 20%  | 20%   |
| 2019           | 75%  | 40%   |
| 2020 & onwards | 100% | 40%   |

**Table S3. Proportion Who Receive DTG-based ART Among HIV-Infected Men & Women Initiating ART**

We modeled and compared three different testing strategies for women who do not initiate dolutegravir-based ART in Kenya over a 15-year time horizon starting in 2019 (t0): 1) empiric NNRTI-based ART with no PDR testing, 2) PDR testing with OLA, and 3) PDR testing with CS (diagnostic performance of OLA and CS are discussed in detail in Section 2). For PDR testing strategies using either OLA or CS, PI-based ART is initiated when PDR is detected, and NNRTI-based ART is used for all other patients. The probability of virologic failure on one’s initial ART regimen is determined by PDR status and the ART regimen where individuals who have PDR to their initial ART regimen have a higher probability of virologic failure compared to those who do not have PDR to their initial ART regimen (discussed in detail in Appendix Section 2).

During the period from 2003 to 2017, which was used for calibration, initial viral load testing switches from occurring at 12 months after ART initiation to 6 months after ART initiation in the year 2014. From that point on, we assume viral load testing occurs at 6 months after ART initiation and every 12 months thereafter. To estimate the cost of CD4 cell count testing, we assume that CD4 cell count is checked at baseline and when virologic failure is detected to assess for risk of opportunistic infections.<sup>24</sup> Switching from first-line to second-line therapy is indicated when virologic failure was identified through viral load testing (the probability of switching to 2<sup>nd</sup>-line ART when indicated is described in more detail below in the Cascade of Care Section). Patients who experience treatment failure on PI-based second-line ART continue this therapy because of survival advantages associated with a non-suppressive regimen compared with discontinuation of ART.<sup>25</sup> Patients with virologic failure who were continued on ART had a lower viral “set point” and their rate of CD4 decline was slower.<sup>25</sup>

#### **D. Cascade of Care and ART Coverage**

##### **Overview**

The cascade of care model input parameters are designed to be consistent with Kenyan Ministry of Health guidelines and calibrated to achieve ART coverage rates that have been observed in Kenya over time. ART coverage is an important population level outcome that strongly influences the prevalence of PDR. As ART coverage increases, the number of HIV-infected individuals who can develop acquired drug resistance (ADR) increases, and patients with ADR have the potential to transmit drug resistance mutations to others they infect. Therefore, the prevalence of PDR tends to increase as ART coverage increases. Thus, it was important to model ART coverage accurately from 2003-2017, in order to ensure we made accurate assumptions about other key parameters involved in the emergence and transmission of drug resistance, including the probability of virologic failure, of developing ADR among those who experience virologic failure, and of switching to second-line ART when virologic failure is identified by a viral load test. A detailed explanation of how drug resistance is modeled is provided in Appendix Section 2, and our model calibration is explained in Appendix Section 3.

ART initiation thresholds over time were based on published guidelines.<sup>18,26,27</sup> Other cascade of care parameters were based on a range of values published in the literature and adjusted such that the ART coverage rates generated by the model matched observed ART coverage rates in Kenya.

## Cascade of Care Parameters

Our model includes the following cascade of care parameters:

- Annual probability of being tested/screened for HIV
- Linkage to care parameters
  - Probability of being linked to care when a patient becomes aware of her HIV-infected status
  - Probability of being lost-to-follow-up (LTFU) after being diagnosed with HIV but before ART initiation
  - Probability of having access to ART when ART is indicated
  - Probability of LTFU after ART initiation
  - Probability of a LTFU individual returning to care when she has an acute OI
- ART initiation threshold
- Probability of switching to second-line ART when virologic failure is identified by a viral load test

### Annual Test Probability

According to the 2012 Kenya AIDS indicator survey report, in 2007 and 2012, 34.3% and 71.3% of individuals 15-64 years old in Kenya had ever been tested for HIV, respectively.<sup>28,29</sup> To reproduce a similar data trend, we assumed that in 2003 the annual probability of receiving an HIV test among uninfected individuals was low at 10% and that this probability increased by approximately 10% each year (Table S4).

| Year            | Annual Test Probability |
|-----------------|-------------------------|
| 2003            | 0.1                     |
| 2005            | 0.2                     |
| 2006            | 0.3                     |
| 2007            | 0.34                    |
| 2008            | 0.4                     |
| 2009            | 0.5                     |
| 2010            | 0.6                     |
| 2011            | 0.7                     |
| 2012 and onward | 0.8                     |

**Table S4. Annual Probability of an Adult Being Screened for HIV**

### Linkage to Care Parameters

We obtained baseline estimates for LTFU parameters from a systematic review that examined attrition rates determined by death after starting ART, treatment discontinuation, and LTFU (Table S5).<sup>30</sup> We assume that when a patient who has initiated ART is LTFU they stop taking ART, and CD4 cell count and viral load dynamics are modeled accordingly. Among those who are lost to follow-up, there is a probability assigned to them of returning to care and resuming ART. We focused primarily on the issue of loss to follow-up as a separate event from early mortality after ART initiation.

| Parameter                                                                          | Monthly Probability |
|------------------------------------------------------------------------------------|---------------------|
| Probability of being LTFU after being diagnosed with HIV but before ART initiation | 0.005               |
| Probability of having access to ART when ART is indicated                          | 0.8                 |
| Probability of LTFU after ART initiation                                           | 0.000875            |
| Probability of returning to care after being LTFU with an acute OI                 | 0.5                 |

**Table S5. Linkage to care parameters**

### ART Initiation Threshold

Although new recommendations regarding when to initiate ART are likely adopted gradually over time, we assumed that they were fully implemented the year they were recommended (Table S6).<sup>18,26,27</sup>

| Year            | CD4 Cell Count                         |
|-----------------|----------------------------------------|
| 2003-2009       | < 200                                  |
| 2010-2013       | < 350                                  |
| 2014-2015       | < 500                                  |
| 2016 and onward | Treat all regardless of CD4 cell count |

**Table S6. ART Initiation Thresholds in Kenya**

1 Probability of Switching to Second-line ART

2 Viral load testing for individuals on NNRTI-based first-line ART is used to inform the decision of whether to continue  
3 first-line ART or to switch to second-line ART. Ideally, individuals with unsuppressed viral load, despite optimal  
4 adherence, should be switched to PI-based second-line ART. However, prior studies suggest that rates of switching to  
5 2<sup>nd</sup>-line ART when clinically indicated have been inappropriately low in sub-Saharan Africa.<sup>31,32</sup> Data on the  
6 probability of switching to second-line ART when virologic failure on first-line ART is not readily available for  
7 Kenya. We assume that the probability of switching to second-line ART has gradually increased since ART roll-out  
8 began as the price of PI-based ART has decreased and access has presumably improved.  
9

10 We used estimates of the proportion of patients on ART in Kenya using PI-based ART at two time points (2006 and  
11 2018) to inform the model inputs for the probability of switching to PI-based second-line ART when virologic failure  
12 is detected (Table S6). First, a multi-country survey conducted in resource-limited settings by WHO found that in  
13 2006, among adults on ART, 4% were on second-line ART (PI-based) and 96% were on first-line ART.<sup>33</sup> Second,  
14 based on data published online by the Kenyan National AIDS/STD Control Programme (NAS COP), we estimate that  
15 in 7.4% of patients on ART in Kenya in 2018 were using PI-based ART.<sup>34</sup>  
16

17 In the model, when testing reveals an unsuppressed viral load in a patient, a random number is generated for this  
18 patient, and if the random number is less than the assigned probability of switching to second-line ART, then the  
19 patient will switch to second-line ART. Otherwise, the patient will remain on first-line ART. If a patient is detected  
20 with virologic failure but is not switched to second-line ART at that time, they will be eligible for switching regimens  
21 the next time viral load testing is performed (using the same algorithm), which we assume occurs 12 months later,  
22 although there is little data to guide this assumption. We implement the following probabilities of switching to 2<sup>nd</sup>-  
23 line ART, given unsuppressed viral load at testing, over time (Table S7):  
24

| Year             | Probability |
|------------------|-------------|
| 2003-2007        | 0.1         |
| 2008-2012        | 0.2         |
| 2013             | 0.25        |
| 2018 and onwards | 0.6         |

**Table S7. Probability of Switching to PI-based Second-Line ART When Virologic Failure is Diagnosed**

25  
26 **E. HIV Transmission**  
27

28 Our model was set in a region where HIV disease transmission is predominantly through heterosexual contact. The  
29 risk of infection for those who are HIV-negative was evaluated monthly in multiple stages. First, the model determined  
30 whether any of an individual's partners were infected with HIV, based on the number of partners that individual had  
31 and the prevalence of HIV during that month. For each infected partner, the model determined what HIV state he/she  
32 was in, either acutely infected (for no more than three months), on effective ART, or chronically infected with any  
33 one of four classes of elevated viral load.<sup>9,35,36</sup> The probability of being in each any one of those states was proportional  
34 to the proportion of HIV-infected persons in that state in the population. If an HIV-negative person had an HIV-  
35 infected partner, the monthly probability of acquiring HIV that month was a function of the number of sex acts per  
36 month, his/her partner's HIV state, and risk modifications such as male circumcision. We assumed the probability of  
37 transmission per sexual act was higher with acute HIV and with higher viral load levels of the infected partner,<sup>35-37</sup>  
38 and we assumed that men who were circumcised had a 55% reduction in risk of acquiring HIV.<sup>38-40</sup>  
39

40 For the purpose of modeling transmission, from 2003-2017, HIV prevalence and the probability of an HIV-infected  
41 partner being in a given viral load category were dynamically calculated each month among men and women as a  
42 whole. Starting in 2018, these calculations became sex-specific because rates of virologic failure were no longer  
43 uniform for men and women with the introduction of dolutegravir. Further, using sex-specific calculations allowed us  
44 to project sex-specific PDR prevalence trends.  
45  
46  
47  
48

## F. Population Growth and Size

We modeled population growth, which provides a measure of the secondary benefits of each improved care strategy. That is, because we modeled “entries” into the population as a function of the size of population in childbearing age, reducing deaths may be expected to lead to an increase in population growth. We made simplifying assumptions in modeling population size, such as the assumption that fertility rates will remain unchanged over the next 15 years and with different courses of the HIV epidemic. As a result, our estimates of population growth provide a comparison among the strategies about the potential demographic benefits of HIV care rather than real predictions about population size change.

Each time we simulated a scenario with a unique set of parameter values (such as the base-case scenario or various sensitivity analysis scenarios), the simulation began running in 2003 with an initial population size of 3 million people, and it was run 3,000 times. Model outcomes from these simulations that are count data (such as costs, QALYs gained, number of new infections, etc.; as opposed to proportions, such as percentage of HIV-infected adults with viral suppression) were scaled-up to a population size equivalent to the population size of Kenya.

## Section 2: Modeling Drug Resistance

### A. Overview of Drug Resistance Model

Our model simulates the emergence of ADR in patients receiving ART and the transmission of drug resistance mutations from HIV-infected individuals to previously uninfected individuals. We model drug resistance status in each patient as the presence or absence of a mutation that confers resistance to the NNRTI class of antiretroviral drugs, and each mutation is modeled as being in either the majority or minority state over time. Each patient can have a maximum of one mutation. We define the development of ADR as the emergence of a drug resistance mutation while a patient is on ART. We define a transmitted drug resistance (TDR) mutation as a mutation in a patient that was transmitted to her by her source partner. Of note, we assume mutations can only be transmitted to others when they are in the majority state. When describing our model, we primarily use the term PDR, but PDR and TDR are essentially interchangeable terms, with respect to the model. The is different from the more common use of the term PDR, which includes both resistance among ART-naïve individuals (namely TDR) and resistance among individuals who are about to initiate first-line ART but have a prior history of ART exposure.<sup>41</sup> PDR, ADR, and majority/minority states are described in more detail below.

Although, in reality, HIV-infected individuals can have more than one mutation and can have mutations that confer resistance to multiple drugs or classes of drugs, we chose to only model mutations that confer resistance to the NNRTI class of drugs and allow a maximum of one mutation per individual for a few important reasons. First, this approach makes it feasible to conduct a one-way sensitivity analysis on the diagnostic sensitivity of OLA, which is important because we hypothesized that the diagnostic sensitivity of OLA would be correlated with whether or not OLA was cost-effective. If we had modeled more than one type of mutation and allowed individuals to have more than one mutation, the proportion of individuals with mutations detectable by OLA would likely change of time, preventing us from being able to directly control the diagnostic sensitivity of OLA through input parameters. Second, there is very little data describing the proportion of PDR at the population level that is made up by NNRTI vs. NRTI mutations over time, making it difficult to know if we are modeling these trends correctly. Third, when an HIV-infected individual has multiple mutations and transmits HIV to a sexual partner, there is limited data describing what proportion of the time more than one of these mutations is transmitted. We chose to focus on modeling NNRTI mutations because they are the most common PDR mutations, and in the absence of selective pressure, they tend to stay in the majority state for a longer period of time relative to other types of mutations.<sup>42</sup> For example, if a patient had PDR with a K103N and an M184V mutation, in the absence of selective pressure, the M184V mutation would likely convert to minority state prior to the K103N mutation would.

One of the limitations of modeling a maximum of one mutation per person is that when making assumptions about the probability of virologic failure in a patient with PDR, one cannot assign different probabilities associated with different types of mutations or with having multiple mutations. In general, there is limited published data describing increased risk of virologic failure associated with specific types of mutations or multiple mutations. However, we address this limitation through a one-way sensitivity analysis of the probability of virologic failure associated with



1 having PDR. Also, by modeling only one type of mutation, this may underestimate the prevalence of PDR, which we  
2 address through a one-way sensitivity analysis of PDR prevalence, described in detail in Section 5.

## 3 4 **B. Transmission of Drug Resistance**

### 5 6 **Overview of transmission of drug resistance**

7 We assume that when a source partner with a drug resistance mutation transmits HIV to another individual through  
8 sexual contact, the source partner's mutation will be also be transmitted if this mutation is in the majority state. We  
9 apply this assumption to all mutations, regardless of whether they originated from PDR or ADR. We also assume the  
10 presence of drug resistance does not affect the probability of HIV transmission occurring.

11  
12 Because our model does not explicitly represent sexual partnerships between individuals in the model, it cannot  
13 determine who the source partners are for newly infected individuals. Thus, we do not know whether or not those  
14 source partners had drug resistance. As described in Section 1, at the start of each monthly cycle, the model  
15 probabilistically determines which individuals become infected with HIV, as a function of multiple factors, including  
16 number of sexual partners and viral load distribution in the population. Each monthly cycle, after the model  
17 determines which individuals are newly infected, we use a similar probabilistic approach to determine who among  
18 them received PDR. Individuals who have a mutation transmitted to them receive a maximum of one PDR mutation,  
19 as our model allows for a maximum of one mutation per individual. Although prior studies show that some patients  
20 may have multiple PDR mutations, the majority of patients with PDR have only one mutation.<sup>43</sup>

#### 21 22 Algorithm for determining who receives PDR:

23 **Step 1:** For each newly infected individual, we assume the *probability of receiving PDR* is equal to the  
24 *prevalence of drug resistance in the majority state among patients of the opposite sex with unsuppressed*  
25 *viral load (>500 copies/mL)*, which is calculated by the following equation:

$$26 \quad \text{(number of individuals with unsuppressed viral load with a mutation in majority state)} / \text{(number of}$$
$$27 \quad \text{individuals with unsuppressed viral load)}$$

28  
29  
30 This prevalence is calculated among patients with unsuppressed viral load because the probability of a patient  
31 with viral suppression transmitting HIV is close to zero.

32  
33 **Step 2:** For each newly infected individual, a random number between 0 and 1 is generated and compared to  
34 the *probability of receiving PDR* (as defined in Step 1). For each newly infected individual, if this random  
35 number is less than or equal to the *probability of receiving PDR*, then the individual receives PDR.

## 36 37 38 **C. Emergence of Acquired Drug Resistance**

### 39 40 **Overview**

41 Our model simulates the emergence of ADR among patients who experience virologic failure on NNRTI-based first-  
42 line ART. A systematic review found that 53% to 90% of individuals with unsuppressed viral load at 48 weeks after  
43 ART initiation had drug resistance.<sup>44</sup> We assume the probability of developing ADR among patients with virologic  
44 failure on NNRTI-based first-line ART is 80%, based on published data and model calibration. Importantly, because  
45 our model allows for a maximum of one general mutation per individual, patients who already have a TDR mutation  
46 cannot develop a second mutation through ADR, and a patient can only develop one mutation through ADR while on  
47 ART.

#### 48 49 Algorithm to determine who develops ADR

50 **Step 1:** During each monthly cycle, the model identifies patients who are eligible for developing ADR, based  
51 on meeting all of the following criteria:

- 52 1) No current drug resistance
- 53 2) On first-line ART
- 54 3) Experiencing virologic failure

55 **Step 2:** For each individual who is eligible for developing ADR, a random number between 0 and 1 is  
56 generated during the monthly cycle in which virologic failure occurs.

1            Step 3: This random number generated for each eligible individual is compared to the probability of  
2            developing ADR among patients who experience virologic failure on first-line ART, which is 80%.

3  
4            Importantly, the presence of an ADR mutation does not increase the probability of failure in this model, as emergence  
5            of an ADR mutation is conditional upon a patient already experiencing virologic failure on first-line ART. The main  
6            purpose of simulating the emergence of ADR is to model the transmission of ADR and its contribution to the  
7            increasing prevalence of PDR. Also, we do not account for the emergence of ADR among patients who do not fail  
8            ART. We do not model the development of ADR among individuals on PI-based ART, including those who initiated  
9            treatment with PI-based ART in response to drug resistance testing results. Finally, we do not model the development  
10           of ADR among individuals on dolutegravir (**DTG**)-based ART.

#### 11 12 13            **D. Majority and Minority States**

14  
15           We model mutations as being in either the majority or minority state, and mutations can transition from the majority  
16           state to the minority state over time in the absence of selective pressure. The main purpose of modeling mutations as  
17           being in either the majority or minority state over time is to accurately model the prevalence of PDR over time, as we  
18           assume that only mutations in the majority state can be transmitted. Conceptually, we define a mutation as being in  
19           the majority state if it can be detected by consensus sequencing, which typically detects mutations present in at least  
20           20% of the viral population. Individuals with a mutation present in less than ~ 20% of the viral population are referred  
21           to as being in the minority state. We assume mutations that develop through ADR transition from the majority to  
22           minority state within 3 months without selective pressure.<sup>45,46</sup> In contrast, PDR mutations (those transmitted from one  
23           partner to another) persist in the majority state for a significantly longer period of time.<sup>42</sup>

24  
25           When an individual is first infected with HIV and receives PDR, the drug resistance mutation begins in the majority  
26           state. Because we model drug resistance status in each patient as the presence or absence of a mutation that confers  
27           resistance to the NNRTI class of antiretroviral drugs, selective pressure is applied to the mutation only when the  
28           patient is taking NNRTI-based ART. In the absence of selective pressure, each month we assume there is some  
29           probability the mutation will convert from the majority to the minority state. We will henceforth refer to this  
30           probability as the *minority conversion probability*. Our estimate of the *minority conversion probability* is based on a  
31           study that followed ART-naïve, HIV-infected individuals with PDR longitudinally to estimate what proportion of  
32           patients continue to have mutations detectable by consensus sequencing over time.<sup>42</sup> They used a parametric  
33           proportional hazard model to predict the percentage of transmitted mutations that would be expected to be in the  
34           minority state by 6 months, 1 year, 2 years, 3 years, and 4 years after HIV infection. Using data from Table 2 from  
35           *Jain et al.*, we calculated the monthly rate of conversion for NNRTI mutations, based on model projections for 6  
36           months, 1 year, 2 years, 3 years, and 4 years after HIV infection. Next, we take the average of each of these monthly  
37           rates and convert to a monthly probability, which was equal to 0.0037 (95% CI 0.0009 – 0.0143). Based on our  
38           calibration (described in detail in Section 3), we used a value of 0.001, in order for our model PDR prevalence trends  
39           to be consistent with empirically observed trends.

40  
41           Finally, if a mutation converts to the minority state, we assume that the mutation converts back to the majority state  
42           within one month of initiating first-line ART.<sup>47</sup>

#### 43 44 45           **E. Performance of Drug Resistance Tests**

46  
47           We define the **diagnostic sensitivity** of a PDR test as the proportion of individuals who truly have PDR who are  
48           diagnosed as having PDR.<sup>48</sup> First, in order for a PDR test to detect a PDR mutation in a patient, the PDR testing  
49           method must be capable of detecting the specific type of mutation this patient has. We assume consensus sequencing  
50           can detect all types of mutations that can confer resistance to ART. In contrast, OLA is designed to detect a pre-  
51           specified set of common and clinically significant mutations. For example, in a recent randomized trial in Kenya, the  
52           version of OLA used was designed to detect K103N, Y181C, G190A, and M184V.<sup>49</sup> Second, in order for a PDR test  
53           to detect a PDR mutation in a patient, the mutation must be present at a frequency above the PDR testing method's  
54           **analytical sensitivity**, which we define as the lowest frequency (or concentration) of a specific mutation in a sample  
55           detectable by a drug resistance test.<sup>48</sup> While OLA can detect mutants present with at least 2% frequency, consensus  
56           sequencing can typically detect mutants comprising at least 15-25% of an individual's virus population.<sup>50</sup>

We assume that OLA will detect 80% of PDR cases and CS will detect 100% of PDR cases. Although a meta-analysis found that only 59% of PDR cases in low- and middle-income countries had at least one mutation detectable by OLA,<sup>51</sup> a recent trial found that among subjects with virologic failure at 12 months, 100% of subjects with PDR detected by CS were also detected by OLA.<sup>49</sup> Thus, our assumption that OLA detects 80% of PDR cases is intended to synthesize data from these two studies. Our assumption that CS will detect 100% of PDR cases is likely an overestimation, given that OLA can detect mutations present at a lower frequency than CS.<sup>50</sup> We assume both tests have a specificity of 100%.

In the model, the ability of OLA or CS to detect PDR in an individual with a drug resistance mutation is independent of whether or not the mutation is in majority or minority state. In essence, this is assigning OLA and CS the same analytical sensitivity, which is not accurate. However, the reason we do this is it allows us to directly control the diagnostic sensitivity of OLA through the use of a “diagnostic sensitivity” input parameter. Finally, we conduct a one-way sensitivity analysis on the diagnostic sensitivity of OLA to address the simplifying assumptions we make regarding this parameter and also to understand how uncertainty associated with this parameter affects the cost-effectiveness of PDR testing with OLA.

## F. Probability of Virologic Failure

### Overview

The rationale behind each of the assumptions in Table S8 is described in detail below and are based on three major sources of data:

1. Studies describing viral suppression rates on first-line and second-line ART in sub-Saharan Africa, including Kenyan data<sup>52-55</sup>
2. Studies describing the increased risk of virologic failure associated with PDR compared to no PDR<sup>49,56</sup>
3. Model calibration to ensure that virologic failure parameters are consistent with observed PDR prevalence in East Africa (Appendix Section 3)

| 2003-2017                                           |       | Source                                                                                                               |
|-----------------------------------------------------|-------|----------------------------------------------------------------------------------------------------------------------|
| Initial ART (over 12 months)                        |       | McMahon et al <sup>52</sup> ; Hamers et al <sup>56</sup> ; Chung et al <sup>49</sup> ; Calibration                   |
| No PDR on NNRTI-based                               | 20%   |                                                                                                                      |
| PDR on PI-based                                     | 20%   |                                                                                                                      |
| PDR on NNRTI-based <sup>a</sup>                     | 47%   |                                                                                                                      |
| Second-line, PI-based ART (over 24 months)          | 15.2% | Stockdale et al <sup>55</sup>                                                                                        |
| 2018 to future                                      |       | Source                                                                                                               |
| Initial dolutegravir-based ART (over 12 months)     | 6.2%  | Literature review in appendix of Dugdale et al <sup>57</sup> (see “Dolutegravir-based First-line ART” section below) |
| Initial non-dolutegravir-based ART (over 12 months) |       | Kenya Ministry of Health <sup>53</sup> ; Hamers et al <sup>56</sup> ; Chung et al <sup>49</sup>                      |
| No PDR on NNRTI-based                               | 13.6% |                                                                                                                      |
| PDR on PI-based                                     | 13.6% |                                                                                                                      |
| PDR on NNRTI-based <sup>a</sup>                     | 32.0% |                                                                                                                      |
| Second-line, PI-based ART (over 24 months)          | 15.2% | Stockdale et al <sup>55</sup>                                                                                        |

**Table S8. Probability of virologic failure by PDR and ART status**

We assume a lower probability of virologic failure on first-line ART from 2018 and onwards compared to 2003-2017 compared to 2018 and onwards to reflect recent trends of lower rates of virologic failure, which are likely due in large part to improved adherence in an effort to achieve UNAIDS 90-90-90 goals. Our assumptions about the probability of virologic failure from 2003-2017 are consistent with systematic reviews and allow the model to generate a PDR prevalence consistent with observed trends (see Section 3),<sup>52</sup> and our assumptions from 2018 onwards are consistent with recent estimates of viral suppression in Kenya.<sup>53</sup> The probability of virologic failure on an initial ART regimen is assigned based on a patient’s PDR status and ART regimen. During the time periods “2003-2017” and “2018-future”, we assume that the odds of virologic failure are 3.5 times and 3.0 times higher, respectively, for patients with PDR to one’s ART regimen compared to those with no PDR.<sup>49,56</sup> The lower odds ratio for the “2018-future” time period is meant to reflect more recent evidence suggesting that the risk of virologic failure associated with PDR is lower with NNRTI-based regimens including efavirenz/tenofovir compared to those containing nevirapine and/or zidovudine.<sup>58</sup> For patients who fail NNRTI-based first-line ART and switch to PI-based second-line ART, we assume the same probability of virologic failure before and after 2018.

1 Of note, to operationalize a 12-month probability of failure in the model, it is converted into a monthly probability  
2 through the following steps, where  $p$  = probability,  $t$  = time, and  $r$  = rate:

- 3 1) Convert the 12-month probability to a 1-month rate:  $p = 1 - \exp(-rt)$ , where  $t = 12$
- 4 2) Convert the 1-month rate to a 1-month probability:  $r = (-\ln(1 - p)) / t$ , where  $t = 1$

### 6 **2003-2017 First-Line NNRTI-based ART without PDR and with PDR**

#### 7 First-line NNRTI-based ART Without PDR

8 Prior to 2018, estimates of the probability of virologic failure after 12 months on first-line (NNRTI-based) ART in  
9 sub-Saharan Africa vary widely, with reported values ranging between 8 to 30% at 12 months after ART initiation.<sup>52</sup>  
10 In the 2012 Kenya AIDS Indicator survey, 26·1% of those surveyed who were on ART did not have viral suppression.<sup>59</sup>  
11 It is important to note that most of these studies do not make a distinction between individuals with and without PDR,  
12 so there may be some individuals included in these analyses who had PDR to NNRTI-based ART.

14 We assumed the “true” mean probability of virologic failure on NNRTI-based first-line ART in Kenyan adults was  
15 within the range of values reported in the literature. In order to select a point estimate for use as a model input  
16 parameter, we calibrated the model to multiple targets, including PDR prevalence. As described in Section 2B, both  
17 PDR mutations and ADR mutations can be transmitted to newly infected individuals. Thus, as the prevalence of ADR  
18 increases, the prevalence of PDR also increases because there is a larger pool of individuals with resistance that can  
19 transmit mutations to others. The majority of ADR occurs in patients with treatment failure, and our model only  
20 allows for ADR to develop in patients on ART experiencing treatment failure. The prevalence of ADR increases as  
21 the absolute number of people experiencing virologic failure increases, which increases with a higher probability of  
22 virologic failure. We found that, when using a 20% probability of virologic failure on first-line ART over 12 months,  
23 our model generated PDR prevalence levels consistent with observed levels. This probability was also applied to  
24 those with PDR on PI-based ART because prior studies have found rates of failure similar to those without PDR on  
25 NNRTI-based ART.<sup>56</sup>

#### 27 First-line NNRTI-based ART with PDR

28 Once we established the probability of virologic failure on initial ART for patients without PDR, we used data from  
29 two studies to estimate the odds ratio of virologic failure for patients with PDR to initial ART compared to patients  
30 without PDR to initial ART. First, a multi-center cohort study conducted in six sub-Saharan African countries  
31 (including Kenya) found that compared to participants without PDR, the odds ratio for virologic failure was increased  
32 (OR = 2·13) in participants with PDR to at least one prescribed drug, but not in individuals with PDR and fully active  
33 ART.<sup>49,56</sup> Second, in a randomized clinical trial in Kenya, among subjects with PDR to first-line ART, those who  
34 underwent drug resistance testing and started PI-based ART had a 14·3% probability of failure at 12 months compared  
35 to 50·0% probability of failure at 12 months in those who were not tested for drug resistance and started NNRTI-based  
36 ART.<sup>49</sup> Expressed a different way, compared with subjects with PDR on PI-based ART, the odds ratio for virologic  
37 failure was 5·99 in subjects with PDR to at least one prescribed drug. Because failure rates were similar in those  
38 without PDR on NNRTI-based ART and those with PDR on PI-based ART, we assumed the odds ratio is also  
39 applicable to comparing those with PDR to at least one prescribed drug to those without PDR on NNRTI-based ART.

41 Thus, these two studies provide odds ratios ranging from 2·13 to 5·99 estimating the increased risk of failure in those  
42 with PDR to at least one prescribed drug to those on fully active ART. For the 2003-2017 time period, we chose to  
43 use an odds ratio of 3·5 to calculate the probability of failure among those with PDR to at least one prescribed drug.  
44 This OR of 3·5 is skewed slightly towards the cohort study because it had a larger sample size of subjects with PDR.  
45 Using a 20% probability of failure over 12 months among individuals without PDR on NNRTI-based first-line ART  
46 (during 2003-2017) and an OR of 3·5, this produces a 12-month probability of failure of 47% among those with PDR  
47 to NNRTI-based first-line ART.

## 2018 to Future Efavirenz-based First-Line ART with and without PDR

In response to UNAIDS 90-90-90 goals, rates of viral suppression have increased over time, likely due in large part to improved adherence. According to 2018 estimates, approximately 84% of HIV-infected adults on ART in Kenya are virally suppressed (16% had virologic failure).<sup>53</sup> This data does not provide estimates of virologic failure rates among those without PDR and among those with PDR, which is what we need to parameterize our model. We used an algebraic approach to estimating these parameters, where:

- X = probability of virologic failure on efavirenz-based ART without PDR (over initial 12 months on ART)
- Y = probability of virologic failure on efavirenz-based ART with PDR (over initial 12 months on ART)

Our algebraic approach included the following assumptions:

- Proportion of HIV-infected patients on ART with virologic failure in 2018 = 16%
- We assumed proportion of patients with virologic suppression among patients on ART stays relatively stable after the first 12 months on ART<sup>54</sup> (see section on “Long-term Probability of Failure on First-line ART” below)
- PDR prevalence in 2018 = 12.6%. This was the average PDR prevalence in 2018 based on estimates from our model, which is calibrated to observed trends.
- Odds ratio of the probability of virologic failure for patients with PDR to initial ART compared to patients without PDR to initial ART is 3.0.

We solved for X and Y using the following 2 equations:

- $0.874X + 0.126Y = 0.16$
- $(Y/(1-Y)) / (X/(1-X)) = 3.0$

We found X = 13.6% and Y = 32%.

We used an odds ratio of 3.0 for “2018 to future”, as opposed to the odds ratio of 3.5 we used for 2003-2017, to reflect evidence suggesting that suggest the risk of virologic failure with PDR may be lower with the tenofovir/emtricitabine/efavirenz combination compared to other NNRTI-based regimens.<sup>58</sup> In a one-way sensitivity analysis, we varied the probability of virologic failure on efavirenz-based ART with PDR from 23.9-48.6%, such that the odds of virologic failure for those with PDR on efavirenz-based ART compared to those with either no PDR on efavirenz-based ART or those with PDR on PI-based ART varied from 2.0 to 6.0.

## Dolutegravir-based First-line ART

There are currently no population-level estimates of rates of virologic suppression with dolutegravir-based ART in Kenya. Thus, we used a recent literature review to inform our assumptions about the relative risk of virologic failure with dolutegravir-based ART compared to efavirenz-based ART.<sup>57</sup> To parameterize their model-based analysis, Dugdale et al performed a literature review of randomized clinical trials reporting virologic suppression with dolutegravir or efavirenz in combination with two nucleoside reverse transcriptase inhibitors and then pooled these estimates (and weighted by study size). They estimated that the probabilities of viral suppression after 48-weeks on efavirenz-based (only subjects without PDR were eligible) and dolutegravir-based ART were 91% and 96%, respectively. Based on these estimates, for patients without efavirenz-associated PDR, the odds of virologic failure with efavirenz-based ART are 2.37 times higher (odds ratio = 2.37) than the odds of virologic failure with dolutegravir-based ART. Based on this odds ratio of 2.37 and our prior assumption that the probability of virologic failure with efavirenz-based ART without PDR (during the first 12 months of ART) is 12%, we estimate that the probability of virologic failure with dolutegravir-based ART in Kenyan adults (during the first 12 months of ART) is 5.5%. We assume efavirenz-associated PDR does not influence the probability of virologic failure on dolutegravir-based ART. To our knowledge, data from Botswana is the only published programmatic data (non-clinical trial) evaluating viral suppression rates on dolutegravir-based ART sub-Saharan Africa, which found an overall viral suppression rate of 97.4% at 12 months after initiating dolutegravir-based ART.<sup>60</sup>

1 **Long-term Probability of Failure on First-line ART**

2 Data from the clinical studies described above are limited to the first 12 months after ART initiation. Our assumptions  
3 about the long-term probability of virologic failure are based on a systematic review/meta-analysis.<sup>54</sup> Table 2 from  
4 Boender *et al.* provides estimates of the probability of virologic suppression over 6 to 60 months after initiation of  
5 first-line ART, using both on-treatment and intention-to-treat analyses.<sup>54</sup>  
6

| Months on ART | Random Effects Meta-Analysis |                             |                              |
|---------------|------------------------------|-----------------------------|------------------------------|
|               | Summary Estimate             | Low 95% Confidence Interval | High 95% Confidence Interval |
| 6             | 84.9                         | 83.5                        | 86.3                         |
| 12            | 85.6                         | 84.4                        | 86.9                         |
| 24            | 84.4                         | 82.0                        | 86.9                         |
| 36            | 88.5                         | 85.5                        | 91.4                         |
| 48            | 88.6                         | 84.2                        | 93.0                         |
| 60            | 85.2                         | 76.6                        | 93.9                         |

7  
8  
9

**Table S9. Virologic Suppression after 6 to 60 Months of First-Line ART On-Treatment Analysis. Adapted from Boender *et al.*<sup>54</sup>**

10 Because our model already accounts for individuals dropping out of ART use, from either being lost to follow-up and  
11 mortality, we focused on the on-treatment analysis results, which suggests that the proportion of patients who  
12 experience virologic failure while on first-line ART does not grow substantially after the first 12 months.<sup>54</sup> Our  
13 interpretation of these results is that, after the first 12 months on ART, some patients who previously had virologic  
14 failure eventually achieve viral suppression and some patients who previously had virologic suppression experience  
15 virologic failure. Amongst patients on ART, the rate of switching between these two states occurs at such a rate that  
16 the overall proportion of patients with virologic suppression remains relatively stable over the long-term.

17 We wanted our model assumptions to produce results consistent with the meta-analysis' finding that the overall  
18 proportion of patients with virologic suppression remains relatively stable over the long-term. One option would have  
19 been to actually model some long-term probability of virologic failure beyond the first 12 months of ART, as well as  
20 some long-term probability of re-achieving virologic suppression after experiencing virologic failure. However, we  
21 identified two disadvantages to using this approach. First, we do not know what these long-term probabilities of  
22 virologic suppression and failure are. Second, we thought this would make our model unnecessarily more complex  
23 and prone to potential errors in the code.  
24

25 Instead, we assume that if an individual on first-line ART has not experienced virologic failure during the first 12  
26 months of first-line ART that they will continue to maintain viral suppression on this regimen in the future. To be  
27 consistent, we apply this assumption to all individuals on NNRTI-based first-line ART, regardless of PDR status, and  
28 individuals on DTG-based first-line ART. However, if an individual discontinues ART due to being lost to follow up  
29 after 12 months, then this individual will not maintain viral suppression.  
30

31 **PI-based Second-line ART**

32 Our estimate of the probability of virologic failure on PI-based second-line ART is based on a meta-analysis of sub-  
33 Saharan African studies by Stockdale *et al.*<sup>55</sup> Based on their on-treatment analysis at 96 weeks, we assume that once  
34 an individual has switched from first-line ART to second-line PI-based ART, the probability of virologic failure is  
35 15.2% over 24 months in our base-case analysis (range for one-way sensitivity analysis is 10.1-21.2% over 24 months).  
36 We assume that if a patient has not experienced virologic failure on second-line ART after 24 months, she will  
37 maintain viral suppression while on second-line ART. Because we do not model resistance to PI-based ART, this  
38 probability of virologic failure is applied uniformly to all individuals on second-line ART.  
39  
40  
41  
42  
43  
44

## Section 3: Model Calibration

### A. Overview of Calibration

In order to determine what combination of input parameter values to use in the model, we calibrated our simulation model to observed trends in Kenya and sub-Saharan Africa for multiple target outcomes: HIV and PDR prevalence, proportion of HIV-infected individuals on any ART, proportion of HIV-infected individuals on PI-based ART, and population growth. Some aspects of the calibration have been described above in Sections 1 and 2. Here, we provide an overview of our model calibration and additional details that have not been described thus far.

At the beginning of the calibration process, we started with parameter values based on best available reported estimates. These estimates were subsequently adjusted manually to match relevant calibration targets, while using estimates that are within reported 95% confidence intervals for these parameters. Only parameters that strongly influence the value of our calibration targets over time were adjusted through calibration and are described below.

First, we adjusted parameters related to the cascade of care in order to reproduce ART coverage trends similar to those observed in Kenya over time, as described in Section 1. Next, multiple parameters were adjusted to match PDR prevalence and HIV prevalence, simultaneously. This included: 1) probabilities of virologic failure (during 2003-2017), based on PDR status and ART regimen; 2) probability of developing ADR among individuals with virologic failure on NNRTI-based first-line ART); 3) probability of switching to second-line ART when virologic failure is identified (during 2003-2017); and 4) probability of mutation to converting from majority to minority state over time.

### B. Relationship Between PDR Prevalence and Key Parameters

There are several key parameters that strongly influence the prevalence of PDR over time. Both PDR mutations and ADR mutations can be transmitted to newly infected individuals (described in Section 2). As the prevalence of ADR increases, the pool of individuals with resistance that can be transmitted to others increases, and prevalence of PDR increases as a result of this. Because we assume ADR develops among a portion of patients on ART who experience virologic failure, the prevalence of ADR increases as the absolute number of people experiencing virologic failure increases, which increases with higher ART coverage rates and a higher probability of virologic failure. Therefore, PDR prevalence will increase with *increasing* values of: 1) ART coverage, 2) probability of virologic failure on initial ART, and 3) probability of developing ADR among individuals with virologic failure on 1<sup>st</sup>-line ART. PDR prevalence will also increase as the probability of switching to second-line ART when virologic failure is detected *decreases* because this prolongs the time during which patients with drug resistance mutations are virally unsuppressed and able to transmit their resistance to others.

Estimates of the probability of virologic failure at one year on first-line, NNRTI-based ART in sub-Saharan Africa vary widely, with reported values ranging between 8 to 30% at one year (see Section 2F).<sup>52</sup> We found that a 12-month probability of virologic failure of 20% on 1<sup>st</sup>-line ART among HIV-infected adults without PDR, along with an 80% probability of developing ADR among patients with virologic failure would generate sufficient ADR to allow for the PDR prevalence trend observed empirically in Kenya/East Africa (while using values for the probability of switching to PI-based second-line ART after virologic failure was detected, described in Section 1).

### C. Comparing Model Outputs to Calibration Targets

#### Overview

HIV and PDR prevalence trends and model outputs are illustrated in Figure 1 of the manuscript. In this section, Figures S1 and S2 illustrate model outputs for ART coverage and the proportion of patients on ART on PI-based second-line ART alongside historical trends in Kenya.

#### PDR Prevalence

Our model was calibrated to two sources of data on the prevalence of PDR in East Africa. First, Gupta *et al.* 2012 provided estimates of PDR prevalence (including both NNRTI and NRTI mutations) in East Africa among ART-naïve individuals from 0-9 years after the initiation of ART roll-out (with the assumption that ART became available in 2001 in Kenya).<sup>61</sup> Second, Gupta *et al.* 2017 provided an estimate of NNRTI-associated PDR prevalence in East Africa

1 in 2016, which includes both treatment-naïve individuals and those reporting prior exposure to ART who are initiating  
 2 first-line ART.<sup>41</sup> The PDR prevalence predicted by our model was within the 95% confidence intervals for three out  
 3 of the four empirical estimates that served as calibration targets. The PDR prevalence projected by our model in 2016  
 4 is below the range estimated by Gupta *et al*, 2017.<sup>41</sup> The numerator and denominator for PDR prevalence are “number  
 5 of pre-ART patients with PDR” and “number of pre-ART patients”, respectively.  
 6

7 In Figure 1B, there are three relatively small discontinuities in our model PDR prevalence estimates at the start of the  
 8 years 2010, 2014, and 2016, which are caused by a combination of ART coverage expansion and the stochastic nature  
 9 of our model. At the beginning of each of these three years, we assume ART coverage expands, based on evolving  
 10 ART initiation criteria in treatment guidelines (see Section 1D). When ART coverage expands from one month to the  
 11 next, both the numerator for PDR prevalence (number of pre-ART patients with PDR) and the denominator (number  
 12 of pre-ART patients) should decrease. Whether PDR prevalence itself increases or decreases depends on the percent  
 13 reduction in the size of the numerator and denominator.  
 14

15 After accounting for ART initiation criteria (either based on CD4 cell count threshold pre-2016 or treating all HIV-  
 16 infected patients after 2016), our model selects patients for ART initiation at random and without considering PDR.  
 17 Thus, in theory, when ART coverage suddenly expands, the percent reduction in the PDR prevalence numerator and  
 18 denominator should be the same, which would keep PDR prevalence constant. For example, let us consider a case in  
 19 which PDR prevalence is currently 10%, with 10 pre-ART patients with PDR (PDR prevalence numerator) and 100  
 20 pre-ART patients (PDR prevalence denominator). The following month ART coverage expands such that an additional  
 21 10 patients are started on ART. The model would choose 10 out of the 90 pre-ART patients, at random, to initiate  
 22 ART. If the sampling is done at random an infinite number of times, on average, the model would select 1 patient with  
 23 PDR and 9 patients without PDR, since the prevalence of PDR is 10%. Now, we have 9 pre-ART patients with PDR  
 24 (10% reduction in numerator), 90 pre-ART patients (10% reduction in denominator), and PDR prevalence remains  
 25 constant at 10%. This also assumes that PDR prevalence is not changing for reasons other than changes in ART  
 26 coverage. Because of the small number of pre-ART patients with PDR relative to the size of the population and the  
 27 stochastic nature of the model, the proportion of patients with PDR among new patients initiating ART is not always  
 28 equal to the PDR prevalence at that time. Thus, the percent reduction in the numerator and the denominator each time  
 29 ART coverage expansion happens is not exactly the same, which results in the visible model estimate discontinuities.  
 30

31 In Table S10, we show the number of pre-ART patients and the number of pre-ART patients with PDR in the month  
 32 preceding and first month of 2010, 2014, and 2016, and we show the percent reduction in each of these numbers from  
 33 one month to the next. In 2010 and 2014, the percent reduction in the denominator is larger than that for the numerator,  
 34 which results in a sudden increase in PDR prevalence. In contrast, in 2016, the percent reduction in the numerator is  
 35 larger than that for the denominator, which results in a sudden decrease in PDR prevalence.  
 36

|                         | Number pre-ART<br>with PDR<br>(numerator) | % change in number<br>pre-ART with PDR<br>(numerator) | Number pre-ART<br>(denominator) | % change in number<br>pre-ART<br>(denominator) |
|-------------------------|-------------------------------------------|-------------------------------------------------------|---------------------------------|------------------------------------------------|
| <b>Final month 2009</b> | 2,678                                     |                                                       | 47,990                          |                                                |
| <b>First month 2010</b> | 2,547                                     | -5%                                                   | 43,412                          | -10%                                           |
| <b>Final month 2013</b> | 3,363                                     |                                                       | 36,764                          |                                                |
| <b>First month 2014</b> | 2,860                                     | -15%                                                  | 30,442                          | -17%                                           |
| <b>Final month 2015</b> | 3,091                                     |                                                       | 27,249                          |                                                |
| <b>First month 2016</b> | 1,510                                     | -51%                                                  | 15,428                          | -43%                                           |

**Table S10. Values for Numerator and Denominator of PDR Prevalence at Discontinuous Data Points**

37  
 38  
 39  
 40  
 41  
 42  
 43  
 44  
 45  
 46



1 **HIV Prevalence**

2 Population-level survey estimates of HIV prevalence (15-49 years) in Kenya are from the Kenya Demographic and  
3 Health Survey (2003 & 2009) and the Kenya AIDS Indicator Survey (2007 & 2012).<sup>5,7,28,62</sup>

4  
5 **ART Coverage**

6

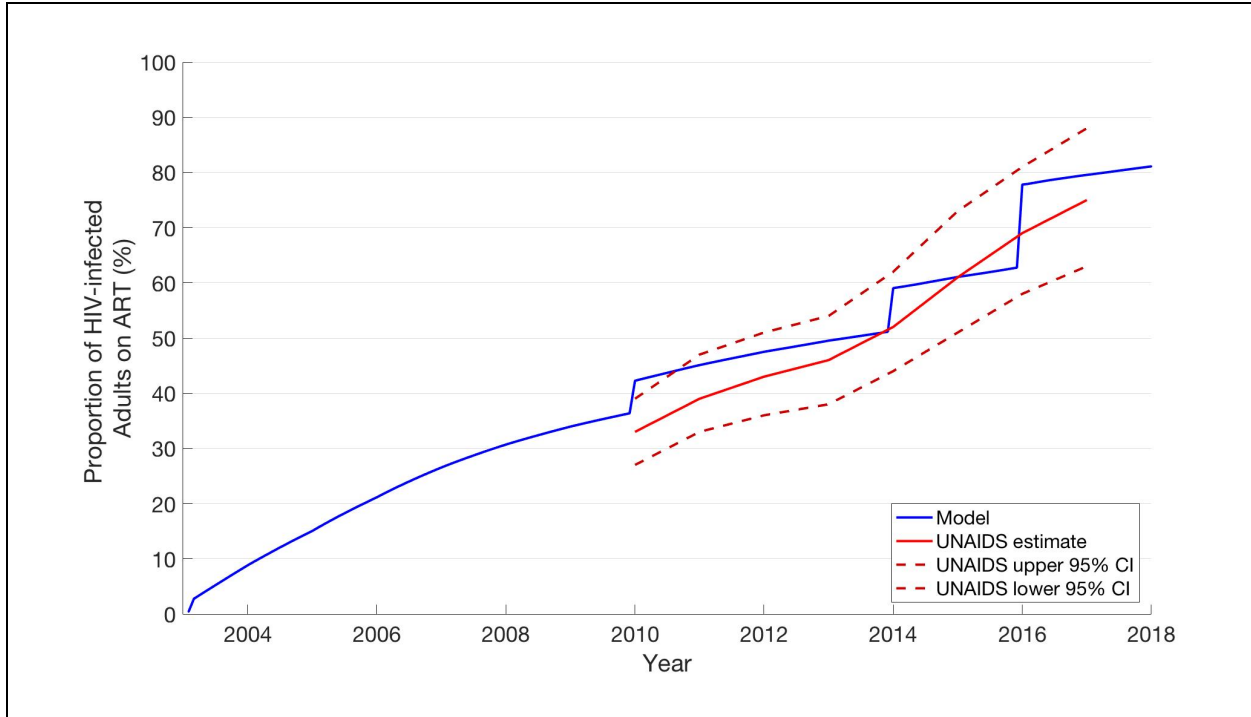

7 **Figure S1. Proportion of adults 15 year and older living with HIV on ART.**

8 UNAIDS Kenya data from 2010-2017 was used for calibration, as ART coverage data prior to 2010 was not readily  
9 available.

10

11

12

13

14

15

16 **Proportion of Patients on ART on PI-based Second-line ART**

17 We calibrated our model to estimates of the proportion of patients on ART in Kenya using PI-based ART at two time  
18 points (2006 and 2018), which was used to inform the model inputs for the probability of switching to PI-based second-  
19 line ART when virologic failure is detected.

20

21 A multi-country survey conducted in resource-limited settings by WHO found that in 2006, among adults on ART,  
22 4% were on second-line ART (PI-based) and 96% were on first-line ART.<sup>33</sup> Based on data published online by the  
23 Kenyan National AIDS/STD Control Programme (NAS COP), we estimate that in 7.4% of patients on ART in Kenya  
24 in 2018 were using PI-based ART.<sup>34</sup> NAS COP reports the number of viral load tests that have been performed in  
25 Kenya, providing a breakdown of the number of patients on each specific combination of antiretroviral agents. We  
26 summed the total number of viral load tests performed for patients on PI-based ART and divided by the total number  
27 of viral load tests performed for all patients on ART. Assuming that the probability of a patient having a viral load  
28 test performed does not significantly differ between different ART regimens, this should provide a reasonable estimate  
29 for the proportion of patients on ART in Kenya using PI-based ART in 2018 year.

30

31

32

1

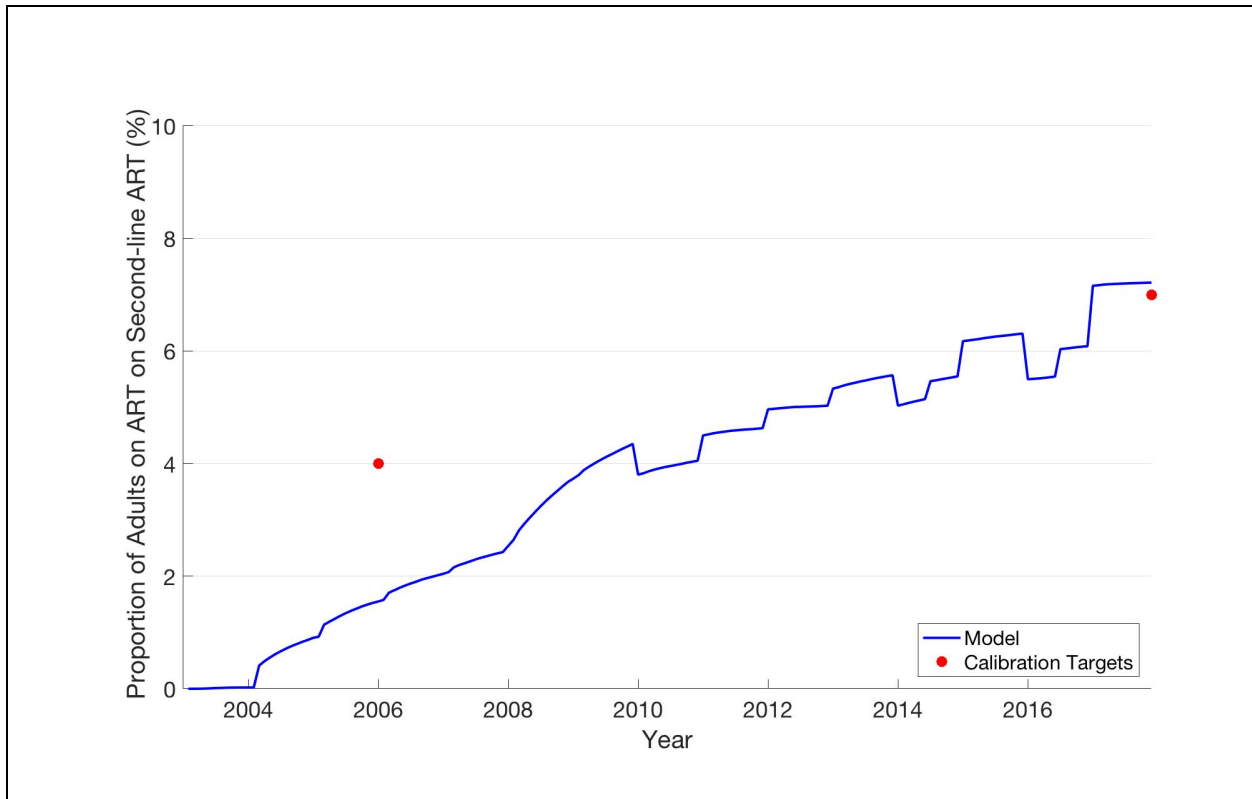

2 **Figure S2. Proportion of adults on ART on PI-based second-line ART**  
3 Estimates for 2006 and 2018 calibration targets are from Renaud-Thery et al. and Kenyan National AIDS/STD  
4 Control Programme data.<sup>33,34</sup>  
5  
6  
7  
8  
9  
10  
11  
12  
13  
14  
15  
16  
17  
18  
19  
20  
21  
22  
23  
24  
25  
26

## Section 4: Costs and Resource Utilization

### A. Assumptions for Inpatient Costs

In the model, the probability of an HIV-infected individual developing an opportunistic infection depends on the patient's CD4 cell count. When someone does develop an opportunistic infection, we assume the patient is admitted to an inpatient health facility, and the number of inpatient days needed depends on the CD4 cell count and ART status (Table S11).<sup>63</sup> After adjusting for inflation, the unit cost of an inpatient day in Kenya is \$60 (2019 US\$).<sup>64</sup> To calculate the total cost of an opportunistic infection, the number of inpatient days is multiplied by the unit cost of an inpatient day in Kenya.

| CD4 Cell Count                | Mean Length of Stay (days) |
|-------------------------------|----------------------------|
| Pre-ART                       | 9.8                        |
| ≤ 100 cells/mm <sup>3</sup>   | 8.1                        |
| 101-200 cells/mm <sup>3</sup> | 7.8                        |
| 201-350 cells/mm <sup>3</sup> | 6.4                        |
| >350 cells/mm <sup>3</sup>    | 7.8                        |
| On ART                        |                            |
| ≤ 100 cells/mm <sup>3</sup>   | 12.3                       |
| 101-200 cells/mm <sup>3</sup> | 13.4                       |
| 201-350 cells/mm <sup>3</sup> | 9.5                        |
| >350 cells/mm <sup>3</sup>    | 7.0                        |

**Table S11. Average number of inpatient days per opportunistic infection by ART status and CD4 cell count.** Adaptation of Table 2 from Meyer-Rath et al.<sup>63</sup>

While the unit cost used per inpatient day is based on an estimate from Kenya, the number of inpatient days per opportunistic infection is based on a South African study.<sup>63</sup> To address uncertainty in the total inpatient costs, we conducted a one-way sensitivity analysis of the unit cost per inpatient day ranging from US\$15 to US\$240 (base-case unit = US\$60). This range was meant to capture uncertainty in both unit cost per inpatient day and the number of inpatient days per opportunistic infection. For example, the \$15-unit cost scenario was meant to represent a situation in which the unit cost was only \$30 (50% of base-case unit cost) and each opportunistic infection resulted in only 50% the number of inpatient days relative to those found in the South African study. Similarly, the \$240-unit cost scenario was meant to represent a scenario in which the unit cost was \$120 (double the base-base unit cost) and each opportunistic infection resulted in double the number of inpatient days relative to those found in the South African study. This approach is based on the mathematical relationship that doubling, or halving, the number of inpatient days per opportunistic infection has the same effect on total inpatient costs as doubling, or halving, the cost per inpatient day, respectively.

### B. Adjusting for inflation

Unit cost estimates for each inpatient day and each outpatient visit in Kenya were originally reported in 2011 US\$.<sup>64</sup> For these estimates, we adjusted for inflation in Kenya from 2011 to 2019 by using inflation indices provided by the International Monetary Fund (IMF).<sup>65</sup>

We visited the IMF website on 5/16/19 and obtained the following inflation indices for the Kenyan health sector.

- Kenya Health Inflation Index 2011 M01 = 110.42
- Kenya Health Inflation Index 2019 M01 = 160.89

The unit cost estimates provided by IHME in 2011 US\$ for inpatient day and outpatient visit were:<sup>64</sup>

- Inpatient day = US\$41
- Outpatient visit = US\$10

We used the following equation for adjusting for inflation and converting from 2011 cost to 2019 cost:

- $Cost_{2019} = (Cost_{2011} * Index_{2019}) / Index_{2011}$
- $Cost_{2019} = (Cost_{2011} * 160.89) / 110.42$

1 Using this equation, and after rounding to the nearest dollar, the unit cost estimates that adjust for inflation per inpatient  
2 day and outpatient visit were US\$60 and US\$15, respectively.  
3

#### 4 **C. Currency conversion**

5 While other unit cost estimates we obtained were already reported in US\$, the unit cost estimate for CD4 cell count  
6 test we obtained in April 2019 was originally in Kenyan shillings (KES). On April 19, 2019 the conversion rate from  
7 Kenyan shillings (KES) to US\$ was 0.009863 KES to US\$1. Using this conversion rate, the cost per CD4 cell count  
8 test equaled US\$11.83. We rounded up to \$12 for the base-case, and in sensitivity analysis explored values ranging  
9 from US\$6 to US\$24  
10

#### 11 **D. Results**

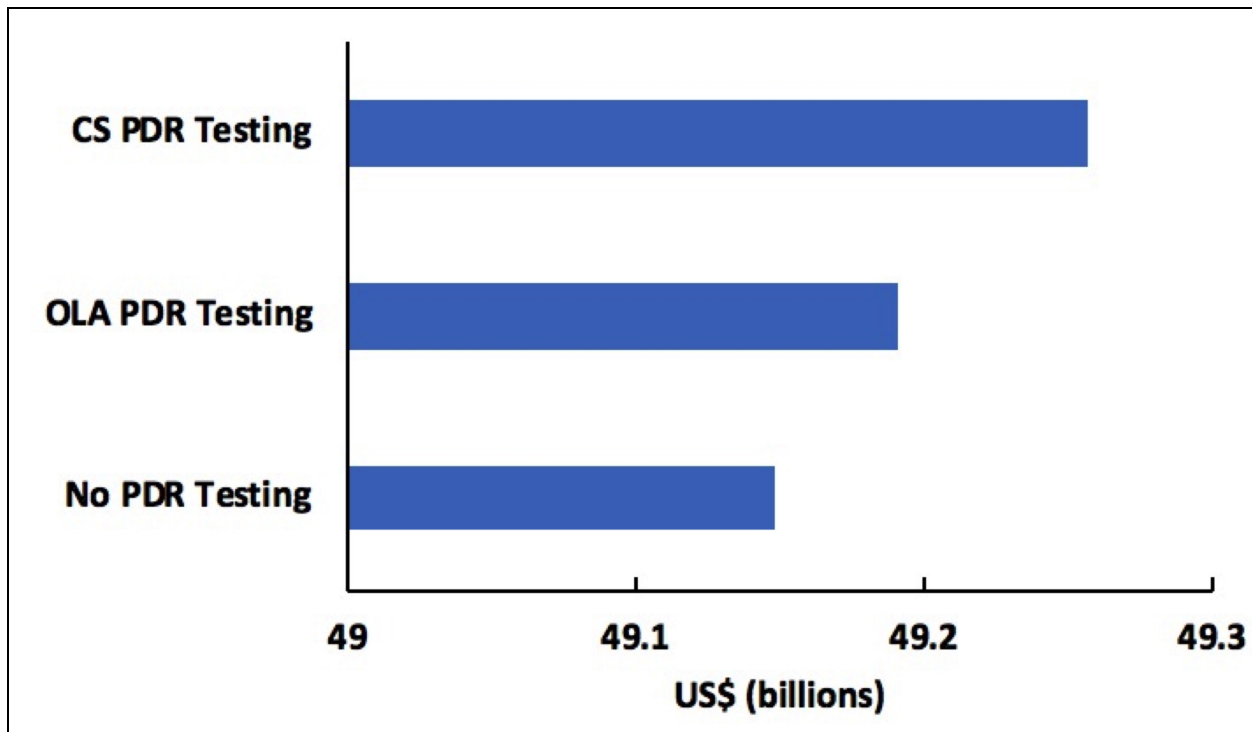

14 **Figure S3. Total cost of each strategy over 15 years**

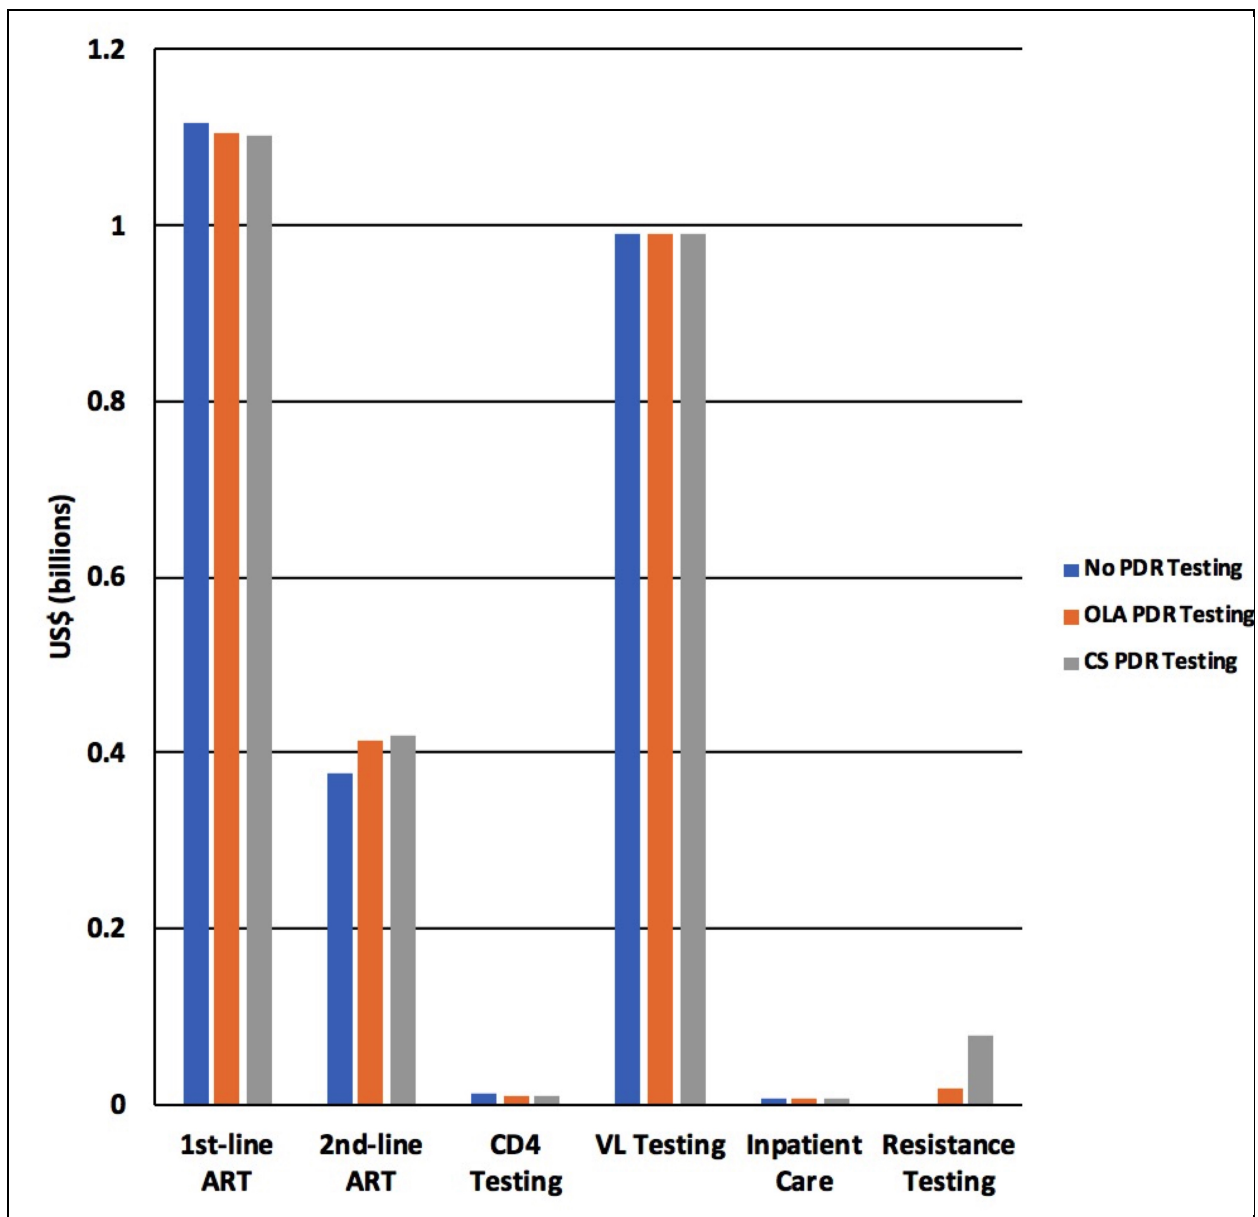

2 **Figure S4. Cost for each strategy by spending category over 15 years**  
 3 This figure does not include HIV screening and background health spending categories.  
 4  
 5  
 6  
 7  
 8  
 9  
 10  
 11  
 12  
 13  
 14  
 15  
 16

1

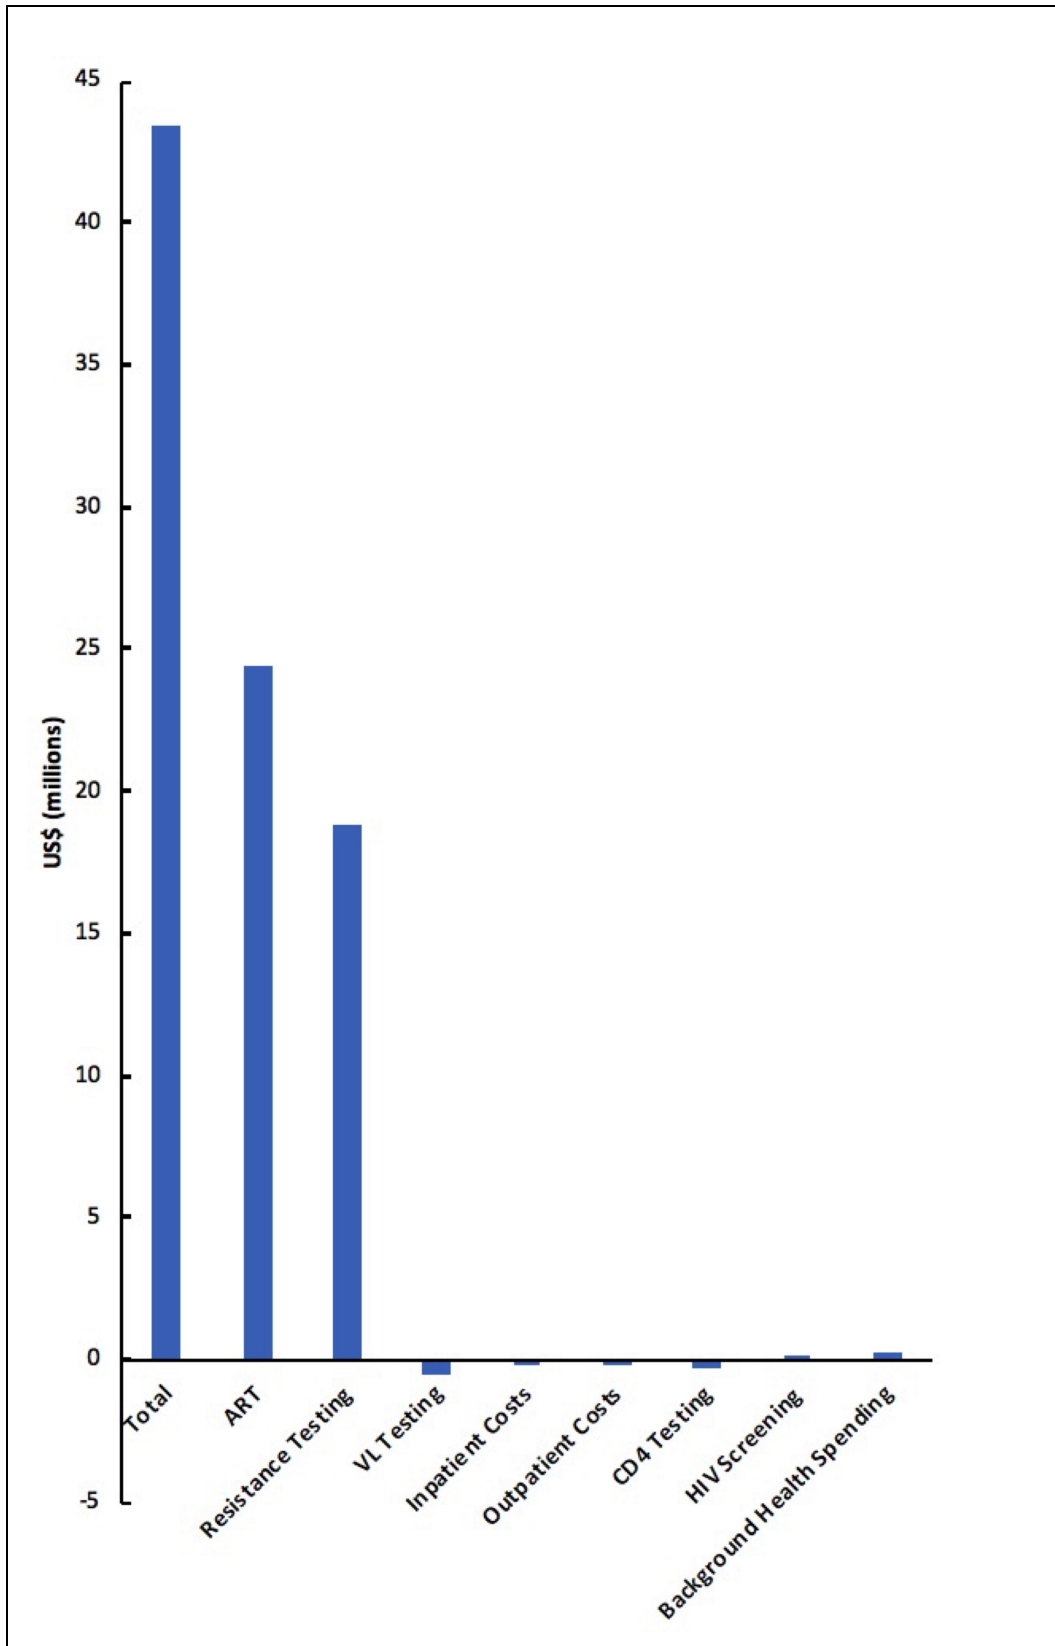

2 Figure S5. Difference in cost between OLA PDR testing and no testing over 15 years by category

## References

1. Bendavid E, Young SD, Katzenstein DA, Bayoumi AM, Sanders GD, Owens DK. Cost-effectiveness of HIV monitoring strategies in resource-limited settings: a southern African analysis. *Arch Intern Med* 2008; **168**(17): 1910-8.
2. Bendavid E, Grant P, Talbot A, Owens DK, Zolopa A. Cost-effectiveness of antiretroviral regimens in the World Health Organization's treatment guidelines: a South African analysis. *AIDS* 2011; **25**(2): 211-20.
3. Bendavid E, Brandeau ML, Wood R, Owens DK. Comparative effectiveness of HIV testing and treatment in highly endemic regions. *Arch Intern Med* 2010; **170**(15): 1347-54.
4. United Nations. World Population Prospects 2017. <https://esa.un.org/unpd/wpp/Download/Standard/Population/> (accessed 1 September 2018).
5. Kenya Ministry of Health. Kenya demographic and health survey, 2003. Nairobi, Kenya; Calverton, MD., USA: Central Bureau of Statistics; Ministry of Health; ORC Macro; 2004.
6. UNAIDS. HIV estimates with uncertainty bounds 1990-2017. [http://www.unaids.org/en/resources/documents/2018/HIV\\_estimates\\_with\\_uncertainty\\_bounds\\_1990-present](http://www.unaids.org/en/resources/documents/2018/HIV_estimates_with_uncertainty_bounds_1990-present) (accessed 1 September 2018).
7. Kenya Ministry of Health. Kenya demographic and health survey, 2008-2009. Nairobi, Kenya: Kenya National Bureau of Statistics; 2010.
8. Kenya Ministry of Health. Kenya demographic and health survey, 2014. Nairobi, Kenya: Kenya National Bureau of Statistics, 2015.
9. Mellors JW, Munoz A, Giorgi JV, et al. Plasma viral load and CD4+ lymphocytes as prognostic markers of HIV-1 infection. *Ann Intern Med* 1997; **126**(12): 946-54.
10. Rodriguez B, Sethi AK, Cheruvu VK, et al. Predictive value of plasma HIV RNA level on rate of CD4 T-cell decline in untreated HIV infection. *JAMA* 2006; **296**(12): 1498-506.
11. Lawn SD, Myer L, Bekker LG, Wood R. CD4 cell count recovery among HIV-infected patients with very advanced immunodeficiency commencing antiretroviral treatment in sub-Saharan Africa. *BMC Infect Dis* 2006; **6**: 59.
12. Battegay M, Nuesch R, Hirschel B, Kaufmann GR. Immunological recovery and antiretroviral therapy in HIV-1 infection. *Lancet Infect Dis* 2006; **6**(5): 280-7.
13. Kaufmann GR, Furrer H, Ledergerber B, et al. Characteristics, determinants, and clinical relevance of CD4 T cell recovery to <500 cells/microL in HIV type 1-infected individuals receiving potent antiretroviral therapy. *Clin Infect Dis* 2005; **41**(3): 361-72.
14. Kaufmann GR, Perrin L, Pantaleo G, et al. CD4 T-lymphocyte recovery in individuals with advanced HIV-1 infection receiving potent antiretroviral therapy for 4 years: the Swiss HIV Cohort Study. *Arch Intern Med* 2003; **163**(18): 2187-95.
15. Badri M, Lawn SD, Wood R. Short-term risk of AIDS or death in people infected with HIV-1 before antiretroviral therapy in South Africa: a longitudinal study. *Lancet* 2006; **368**(9543): 1254-9.
16. Holmes CB, Wood R, Badri M, et al. CD4 decline and incidence of opportunistic infections in Cape Town, South Africa: implications for prophylaxis and treatment. *J Acquir Immune Defic Syndr* 2006; **42**(4): 464-9.
17. Lawn SD, Little F, Bekker LG, et al. Changing mortality risk associated with CD4 cell response to antiretroviral therapy in South Africa. *AIDS* 2009; **23**(3): 335-42.
18. Kenyan Ministry of Health. Guidelines on Use of Antiretroviral Drugs For Treating and Preventing HIV Infection in Kenya 2016. Nairobi, Kenya: NASCOP.
19. Abrams EJ. What's new in WHO Treatment guidelines: the role of DTG in first- and second-line and new directions in early infant diagnosis. IAS 2018; Amsterdam, Netherlands; July 23-27, 2018.
20. Zash R, Makhema J, Shapiro RL. Neural-Tube Defects with Dolutegravir Treatment from the Time of Conception. *N Engl J Med* 2018.
21. WHO. Updated recommendations on first-line and second-line antiretroviral regimens and post-exposure prophylaxis and recommendations on early infant diagnosis of HIV. July, 2018. Geneva: World Health Organization, 2018.
22. Zash R, Holmes L., Diseko, M., Jacobson, D., Brummel, S., Mayondi, G., Isaacson, A., Davey, S., Mabuta, J., Mmalane, M., Gaolathe, T., Essex, M., Lockman, S., Shapiro, R.L. Neural tube defects by antiretroviral and HIV exposure in the Tsepamo Study, Botswana. IAS 2019; Mexico City, Mexico; July 21-24, 2019.
23. WHO. Update of recommendations on first- and second-line antiretroviral regimens. July 2019. Geneva: World Health Organization, 2019.
24. Kenya Ministry of Health. Guidelines on Use of Antiretroviral Drugs for Treating and Preventing HIV Infection in Kenya. 2018 Edition. Nairobi, Kenya: NASCOP, 2018.

- 1 25. Ledergerber B, Lundgren JD, Walker AS, et al. Predictors of trend in CD4-positive T-cell count and  
2 mortality among HIV-1-infected individuals with virological failure to all three antiretroviral-drug classes. *Lancet*  
3 2004; **364**(9428): 51-62.
- 4 26. Kenyan Ministry of Health. Guidelines on Use of Antiretroviral Drugs for Treating and Preventing HIV  
5 Infection: A rapid advice, 2014.
- 6 27. Kenyan Ministry of Health. Guidelines for Antiretroviral Therapy in Kenya. 4th Edition. Nairobi, Kenya:  
7 2011.
- 8 28. Kenya National AIDS and STI Control Programme (NASCOP). Kenya AIDS Indicator Survey 2012: Final  
9 Report. Nairobi, Kenya: NASCOP, 2014.
- 10 29. Ng'ang'a A, Waruiru W, Ngare C, et al. The status of HIV testing and counseling in Kenya: results from a  
11 nationally representative population-based survey. *J Acquir Immune Defic Syndr* 2014; **66 Suppl 1**: S27-36.
- 12 30. Mugglin C, Estill J, Wandeler G, et al. Loss to programme between HIV diagnosis and initiation of  
13 antiretroviral therapy in sub-Saharan Africa: systematic review and meta-analysis. *Trop Med Int Health* 2012;  
14 **17**(12): 1509-20.
- 15 31. Madec Y, Leroy S, Rey-Cuille MA, Huber F, Calmy A. Persistent difficulties in switching to second-line  
16 ART in sub-saharan Africa--a systematic review and meta-analysis. *PLoS One* 2013; **8**(12): e82724.
- 17 32. Haas AD, Keiser O, Balestre E, et al. Monitoring and switching of first-line antiretroviral therapy in adult  
18 treatment cohorts in sub-Saharan Africa: collaborative analysis. *Lancet HIV* 2015; **2**(7): e271-8.
- 19 33. Renaud-Thery F, Nguimfack BD, Vitoria M, et al. Use of antiretroviral therapy in resource-limited  
20 countries in 2006: distribution and uptake of first- and second-line regimens. *AIDS* 2007; **21 Suppl 4**: S89-95.
- 21 34. Kenya National AIDS/STD Control Programme. <https://viralload.nascop.org/>. 2018 (accessed 1 September  
22 2018).
- 23 35. Quinn TC, Wawer MJ, Sewankambo N, et al. Viral load and heterosexual transmission of human  
24 immunodeficiency virus type 1. Rakai Project Study Group. *N Engl J Med* 2000; **342**(13): 921-9.
- 25 36. Gray RH, Wawer MJ, Brookmeyer R, et al. Probability of HIV-1 transmission per coital act in  
26 monogamous, heterosexual, HIV-1-discordant couples in Rakai, Uganda. *Lancet* 2001; **357**(9263): 1149-53.
- 27 37. Wawer MJ, Gray RH, Sewankambo NK, et al. Rates of HIV-1 transmission per coital act, by stage of HIV-  
28 1 infection, in Rakai, Uganda. *J Infect Dis* 2005; **191**(9): 1403-9.
- 29 38. Bailey RC, Moses S, Parker CB, et al. Male circumcision for HIV prevention in young men in Kisumu,  
30 Kenya: a randomised controlled trial. *Lancet* 2007; **369**(9562): 643-56.
- 31 39. Gray RH, Kigozi G, Serwadda D, et al. Male circumcision for HIV prevention in men in Rakai, Uganda: a  
32 randomised trial. *Lancet* 2007; **369**(9562): 657-66.
- 33 40. Auvert B, Taljaard D, Lagarde E, Sobngwi-Tambekou J, Sitta R, Puren A. Randomized, controlled  
34 intervention trial of male circumcision for reduction of HIV infection risk: the ANRS 1265 Trial. *PLoS Med* 2005;  
35 **2**(11): e298.
- 36 41. Gupta RK, Gregson J, Parkin N, et al. HIV-1 drug resistance before initiation or re-initiation of first-line  
37 antiretroviral therapy in low-income and middle-income countries: a systematic review and meta-regression  
38 analysis. *Lancet Infect Dis* 2017; **18**(3): 346-55.
- 39 42. Jain V, Sucupira MC, Bacchetti P, et al. Differential persistence of transmitted HIV-1 drug resistance  
40 mutation classes. *J Infect Dis* 2011; **203**(8): 1174-81.
- 41 43. Spread programme. Transmission of drug-resistant HIV-1 in Europe remains limited to single classes.  
42 *AIDS* 2008; **22**(5): 625-35.
- 43 44. Gupta RK, Hill A, Sawyer AW, et al. Virological monitoring and resistance to first-line highly active  
44 antiretroviral therapy in adults infected with HIV-1 treated under WHO guidelines: a systematic review and meta-  
45 analysis. *Lancet Infect Dis* 2009; **9**(7): 409-17.
- 46 45. Devereux HL, Youle M, Johnson MA, Loveday C. Rapid decline in detectability of HIV-1 drug resistance  
47 mutations after stopping therapy. *AIDS* 1999; **13**(18): F123-7.
- 48 46. Verhofstede C, Wanzele FV, Van Der Gucht B, De Cabooter N, Plum J. Interruption of reverse  
49 transcriptase inhibitors or a switch from reverse transcriptase to protease inhibitors resulted in a fast reappearance of  
50 virus strains with a reverse transcriptase inhibitor-sensitive genotype. *AIDS* 1999; **13**(18): 2541-6.
- 51 47. Havlir DV, Eastman S, Gamst A, Richman DD. Nevirapine-resistant human immunodeficiency virus:  
52 kinetics of replication and estimated prevalence in untreated patients. *J Virol* 1996; **70**(11): 7894-9.
- 53 48. Saah AJ, Hoover DR. "Sensitivity" and "specificity" reconsidered: the meaning of these terms in analytical  
54 and diagnostic settings. *Ann Intern Med* 1997; **126**(1): 91-4.
- 55 49. Chung MH, McGrath CJ, Beck IA, et al. Evaluation of the management of pretreatment HIV drug  
56 resistance by oligonucleotide ligation assay: a randomised controlled trial. *Lancet HIV* 2019.



- 1 50. Castro H, Pillay D, Cane P, et al. Persistence of HIV-1 transmitted drug resistance mutations. *J Infect Dis*  
2 2013; **208**(9): 1459-63.
- 3 51. Rhee SY, Jordan MR, Raizes E, et al. HIV-1 Drug Resistance Mutations: Potential Applications for Point-  
4 of-Care Genotypic Resistance Testing. *PLoS One* 2015; **10**(12): e0145772.
- 5 52. McMahon JH, Elliott JH, Bertagnolio S, Kubiak R, Jordan MR. Viral suppression after 12 months of  
6 antiretroviral therapy in low- and middle-income countries: a systematic review. *Bull World Health Organ* 2013;  
7 **91**(5): 377-85E.
- 8 53. Wamicwe J. Reaching the 90-90-90 in Kenya; where are we? IAS 2018; Amsterdam, Netherlands; July  
9 23-27, 2018.
- 10 54. Boender TS, Sigaloff KC, McMahon JH, et al. Long-term Virological Outcomes of First-Line  
11 Antiretroviral Therapy for HIV-1 in Low- and Middle-Income Countries: A Systematic Review and Meta-analysis.  
12 *Clin Infect Dis* 2015; **61**(9): 1453-61.
- 13 55. Stockdale AJ, Saunders MJ, Boyd MA, et al. Effectiveness of Protease Inhibitor/Nucleos(t)ide Reverse  
14 Transcriptase Inhibitor-Based Second-line Antiretroviral Therapy for the Treatment of Human Immunodeficiency  
15 Virus Type 1 Infection in Sub-Saharan Africa: A Systematic Review and Meta-analysis. *Clin Infect Dis* 2018;  
16 **66**(12): 1846-57.
- 17 56. Hamers RL, Schuurman R, Sigaloff KC, et al. Effect of pretreatment HIV-1 drug resistance on  
18 immunological, virological, and drug-resistance outcomes of first-line antiretroviral treatment in sub-Saharan  
19 Africa: a multicentre cohort study. *Lancet Infect Dis* 2012; **12**(4): 307-17.
- 20 57. Dugdale CM, Ciaranello AL, Bekker LG, et al. Risks and Benefits of Dolutegravir- and Efavirenz-Based  
21 Strategies for South African Women With HIV of Child-Bearing Potential: A Modeling Study. *Ann Intern Med*  
22 2019.
- 23 58. Shafer RW, Frenkel LM. The Clinical Implications of Pretreatment Drug Resistance-A Moving Target.  
24 *Clin Infect Dis* 2019; **69**(2): 215-7.
- 25 59. Cherutich P, Kim AA, Kellogg TA, et al. Detectable HIV Viral Load in Kenya: Data from a Population-  
26 Based Survey. *PLoS One* 2016; **11**(5): e0154318.
- 27 60. Avalos A, Gaolathe, T., Brown, D., Vannappaggari, V., Phillips, H., Melamu, P., Ramaabya, D., Nkomo,  
28 B., Matlho, K., Seatla, K., Jarvis, J.N., Moyo, S., Matshaba, M., Gaseitsiwe, S. 12 Month Outcomes on  
29 Dolutegravir-Based Regimens in Botswana: The Beat Cohort Study. CROI 2019; Seattle, WA, USA; March 4-7,  
30 2019.
- 31 61. Gupta RK, Jordan MR, Sultan BJ, et al. Global trends in antiretroviral resistance in treatment-naive  
32 individuals with HIV after rollout of antiretroviral treatment in resource-limited settings: a global collaborative  
33 study and meta-regression analysis. *Lancet* 2012; **380**(9849): 1250-8.
- 34 62. Kenya National AIDS and STI Control Programme (NASCOP). 2007 Kenya AIDS Indicator Survey: Final  
35 Report. Nairobi, Kenya: NASCOP, 2009.
- 36 63. Meyer-Rath G, Brennan AT, Fox MP, et al. Rates and cost of hospitalization before and after initiation of  
37 antiretroviral therapy in urban and rural settings in South Africa. *J Acquir Immune Defic Syndr* 2013; **62**(3): 322-8.
- 38 64. Institute for Health Metrics and Evaluation (IHME). Health Service Provision in Kenya: Assessing Facility  
39 Capacity, Costs of Care, and Patient Perspectives. Seattle, WA: IHME, 2014.
- 40 65. International Monetary Fund Inflation Index: <http://data.imf.org/regular.aspx?key=61015892>. (accessed  
41 May 16, 2019).
- 42
